# Supplementary material
Source: publisher figshare collection journal article supplement (https://acs.figshare.com/ndownloader/files/4586722)
Supplement: Supplementary file 1 [file 4586722]

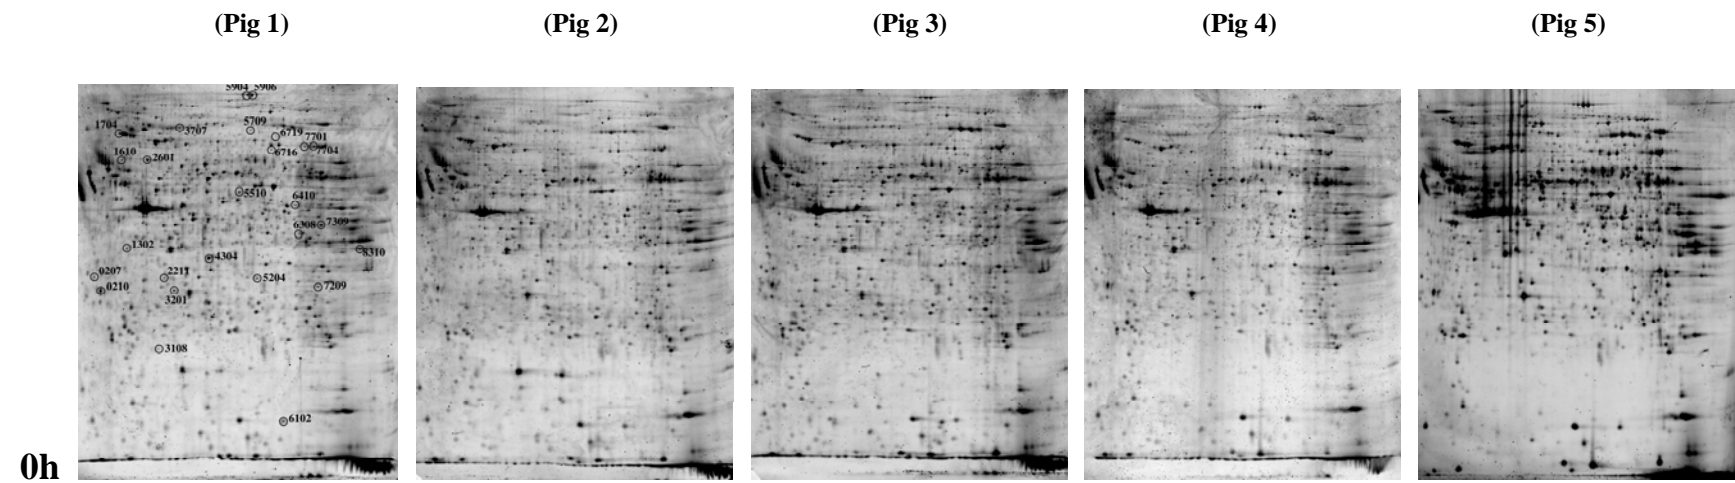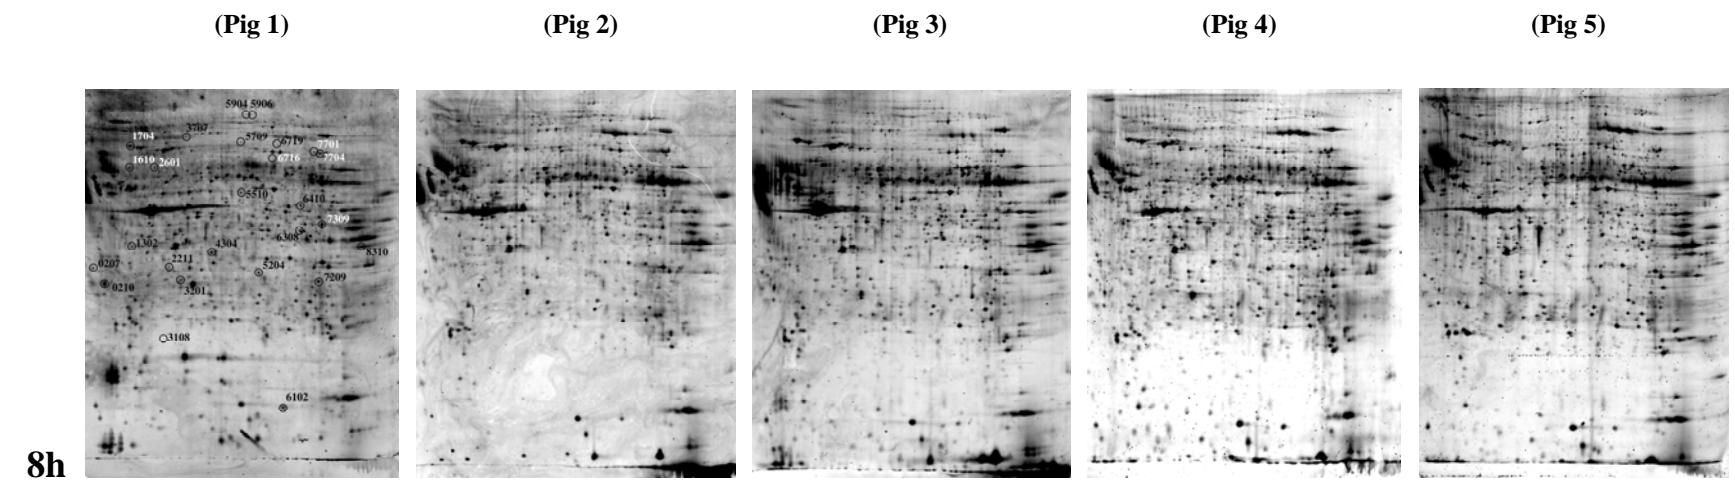

**(Fig 1)**

**17h**

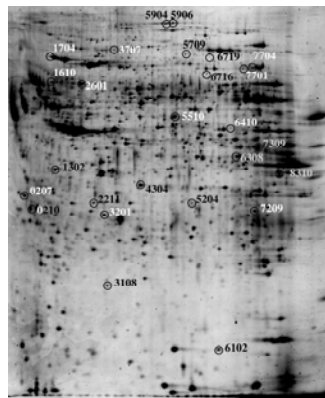

**(Fig 2)**

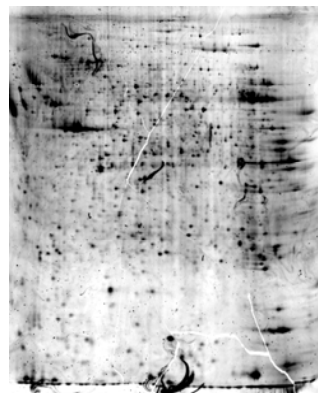

**(Fig 3)**

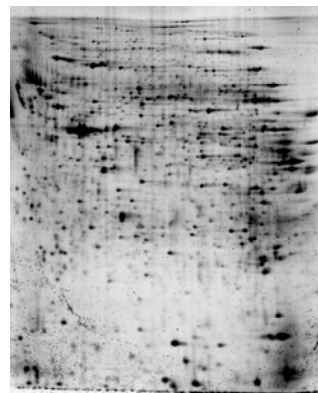

**(Fig 4)**

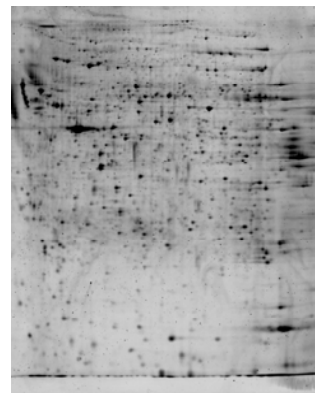

**(Fig 5)**

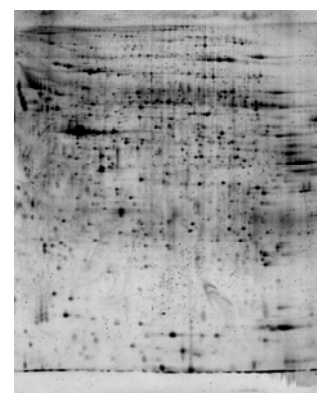

**(Fig 1)**

**24h**

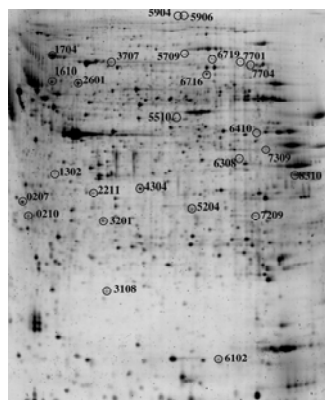

**(Fig 2)**

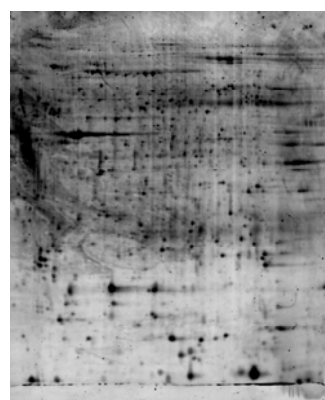

**(Fig 3)**

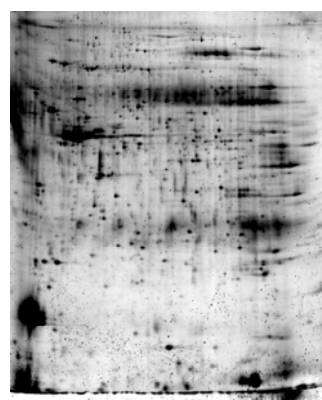

**(Fig 4)**

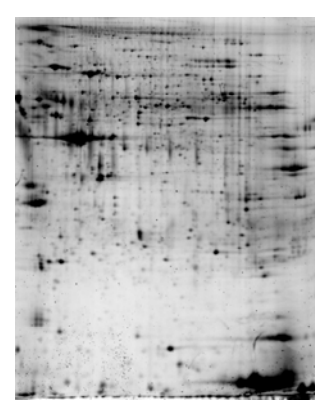

**(Fig 5)**

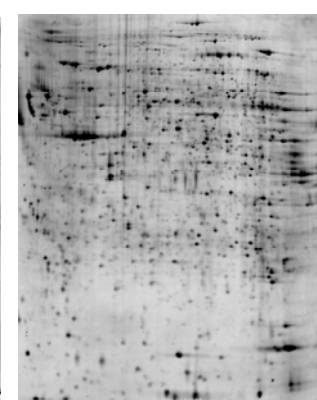

**Supplementary Figure 2-DE gels of intestinal proteome of premature piglets receiving and enteral formula feeding for 8h, 17h, 24h and without enteral feeding.** Intestinal proteins were extracted and resolved with 2-DE with 18cm pH 3-10 NL strips and 12.5% PAGE gels and visualized with SYPRO Ruby stain.
